# Supplementary material for: Electrostatic interaction mechanism of visible light absorption broadening in ion-doped graphitic carbon nitride
Source: Royal Society of Chemistry journal article supplement (doi:10.1039/d1ra02617h), 2021-01-01
Supplement: d1ra02617h1.pdf [file d1ra02617h1.pdf]

Supplementary materials for  
**Electrostatic Interaction Mechanism of Visible Light Absorption  
Broadening in Ion-doped Graphitic Carbon Nitride**

Zengyu Cen, Yuna Kang, Rong Lu\*, Anchi Yu\*

*Department of Chemistry, Renmin University of China, Beijing 100872, P. R. China*

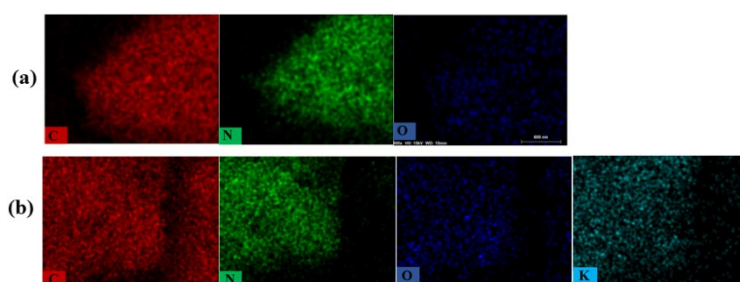

Fig. S1: Element mapping images of CN (a) and CN-K-OOH (b).

Table S1: Elemental composition according to SEM-EDS measurements.

| Sample   | C<br>(at. %) | N<br>(at. %) | O<br>(at. %) | K<br>(at. %) | C/N<br>(at.) |
|----------|--------------|--------------|--------------|--------------|--------------|
| CN       | 39.26        | 56.98        | 3.75         | --           | 0.69         |
| CN-K     | 38.48        | 52.42        | 5.69         | 3.39         | 0.74         |
| CN-K-OOH | 39.13        | 52.65        | 5.28         | 3.26         | 0.74         |

Table S2: Elemental composition from XPS measurements.

| Sample   | C<br>(at. %) | N<br>(at. %) | O<br>(at. %) | K<br>(at. %) | Cl<br>(at. %) |
|----------|--------------|--------------|--------------|--------------|---------------|
| CN       | 38.2         | 46.8         | 15.0         | --           | --            |
| CN-K     | 33.8         | 43.2         | 14.1         | 8.3          | 0.5           |
| CN-K-OOH | 37.3         | 32.9         | 22.8         | 6.6          | 0.4           |

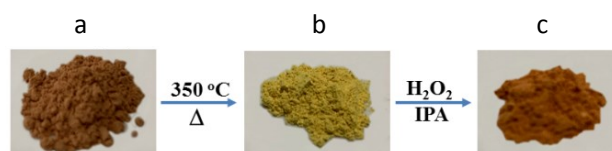

Fig. S2: Photographs of CN-K-OOH (a), the heated CN-K-OOH at 350 °C (b) and the retreated CN-K-OOH (c).

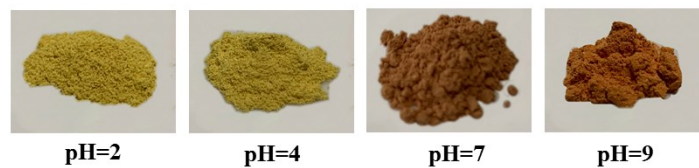

Fig. S3: Photographs of CN-K-OOH at pH=2, 4, 7, 9.

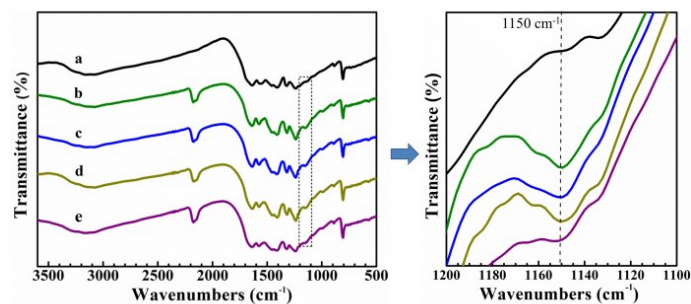

Fig. S4: FTIR spectra of CN (a), CN-K (b), CN-K-OOH (c), the heated CN-K-OOH at 350 °C (d) and the retreated CN-K-OOH (e) .

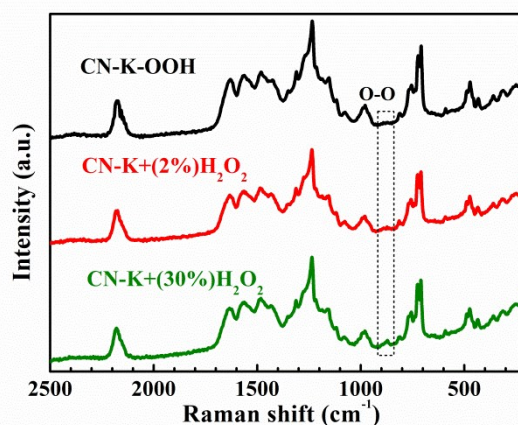

Fig. S5: Raman spectra of CN-K-OOH, CN-K+(2%) H<sub>2</sub>O<sub>2</sub> and CN-K+(30%)H<sub>2</sub>O<sub>2</sub>.

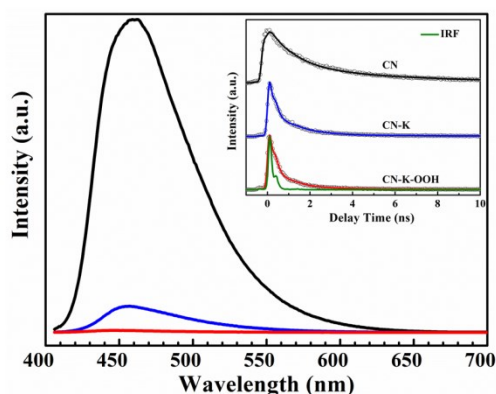

Fig. S6. Fluorescence spectra of CN, CN-K and CN-K-OOH under 375 nm light excitation. Inset: Fluorescence decays of CN, CN-K and CN-K-OOH. Excitation wavelength, 375 nm; detection wavelength, 470 nm.

Table S3: Fluorescence decay fitting parameters with three-exponential function for CN, CN-K and CN-K-OOH.

| $\lambda_{ex}(nm)$ | Sample   | $a_1$ | $\tau_1 (ns)$ | $a_2$ | $\tau_2 (ns)$ | $a_3$ | $\tau_3 (ns)$ | $\langle\tau\rangle (ns)$ |
|--------------------|----------|-------|---------------|-------|---------------|-------|---------------|---------------------------|
|                    | CN       | 0.31  | 1.07          | 0.43  | 4.07          | 0.26  | 9.87          | 4.63                      |
| 375                | CN-K     | 0.30  | 0.13          | 0.47  | 1.19          | 0.23  | 6             | 1.98                      |
|                    | CN-K-OOH | 0.35  | 0.10          | 0.45  | 0.83          | 0.20  | 4.42          | 1.29                      |

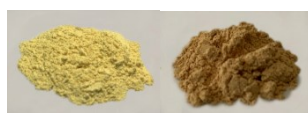

Fig. S7: Photographs of CN-K(0.3 g KCl) (left) and CN-K(0.3 g KCl)-OOH (right).

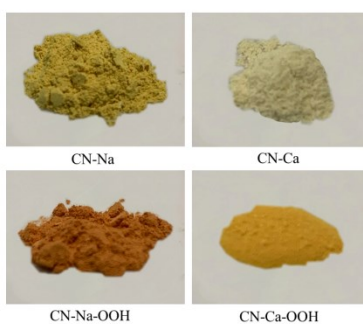

Fig. S8: Photographs of CN-Na, CN-Na-OOH, CN-Ca and CN-Ca-OOH.

Table S4: BET surface area, average pore diameter and pore volume for CN and CN-K-OOH.

| Sample   | $S_{BET}$<br>( $m^2/g$ ) | Average pore diameter<br>(nm) | Pore volume<br>( $cm^3/g$ ) |
|----------|--------------------------|-------------------------------|-----------------------------|
| CN       | 9.97                     | 21.36                         | 0.053                       |
| CN-K-OOH | 5.00                     | 14.46                         | 0.018                       |
